# Supplementary material
Source: publisher site journal article supplement (https://www.dovepress.com/article/288966)
Supplement: Supplementary file 1 [file get_supplementary_file.php]

ONLINE SUPPLEMENTARY APPENDIX

Tanaya Bharatan1

Ratna Devi2,3

Pai-Hui Huang4

Afzal Javed5

Barrett Jeffers6

Peter Lansberg7

Kaveri Sidhu1

Kannan Subramaniam8

1Research, Development & Medical, Upjohn – a Division of Pfizer, Mumbai, India; 2Executive Office, Daksham A Health and Education, Gurgaon, India; 3Chair, Board of Directors, International Alliance of Patient Organizations, London, England; 4Research, Development and Medical, Upjohn – a Pfizer Division, Taipei, Taiwan; 5Warwick Medical School, University of Warwick, Warwick, United Kingdom; 6Pfizer Inc, New York, NY, USA; 7Department of Pediatrics, University Medical Center, Groningen, the Netherlands; 8Research, Development and Medical, Upjohn – a Pfizer Division, Sydney, Australia

# Methods

**Table S1** Medical Subject Heading (MeSH) terms used in systematic literature searches

| **Hypertension** | | | |
| --- | --- | --- | --- |
| “Hypertension”  “blood pressure”  “hypertensives”  “epidemiology”  “prevalence”  “incidence”  “national”  “survey”  “registry”  “Awareness” | “Knowledge”  “health literacy”  “treated”  “treatment”  “therapy”  “control”  “uncontrolled”  “untreated”  “inadequate control”  “diagnosis” | “diagnosed”  “undiagnosed”  “Algeria”  “United Arab Emirates”  “South Africa”  “Egypt”  “Saudi Arabia”  “Middle East”  “Africa” | “Malaysia”  “Philippines”  “Vietnam”  “Thailand”  “Mexico”  “Brazil”  “Argentina”  “Latin America” |
| **Dyslipidemia** | | | |
| “dyslipidemia”  “hypercholesterolemia” “cholesterol”  “triglycerides”  “LDL”  “epidemiology”  “prevalence”  “incidence”  “national”  “survey”  “statistics” | “registry”  “health literacy”  “screening”  “awareness”  “knowledge”  “treated”  “treatment”  “diagnosis”  “undiagnosed”  “diagnosed”  “therapy” | “controlled” “uncontrolled”  “adherence”  “adhere”  “compliance”  “Algeria”  “United Arab Emirates”  “South Africa”  “Middle East”  “Egypt” | “Saudi Arabia”  “Africa”  “Malaysia”  “Philippines” “Vietnam”  “Thailand”  “Mexico”  “Brazil”  “Argentina”  “Latin America” |
| **Depression** | | | |
| “depression”  “major depressive disorder”  “Depressive disorder”  “major depression”  “mental health” “mental disorder”  “mood disorder” “MDD”  “persistent depressive disorder”  “unspecified depressive disorder”  “epidemiology” | “prevalence” “incidence”  “national”  “survey”  “statistics”  “registry”  “real world” “screening”  “awareness” “knowledge”  “treated”  “treatment”  “diagnosis” | “undiagnosed” “underdiagnosed” “diagnosed”  “therapy”  “controlled”  “control”  “uncontrolled”  “adherence”  “adhere”  “compliance” “antidepressants” “Algeria”  “United Arab Emirates” | “South Africa” “Egypt”  “Saudi Arabia” “Middle East”  “Africa”  “Malaysia” “Philippines”  “Vietnam”  “Thailand” “Mexico”  “Brazil”  “Argentina”  “Latin America” |
| **Chronic pain** | | | |
| “low back pain”  “chronic pain”  “fibromyalgia”  “rheumatoid arthritis” “osteoarthritis”  “Arthritis”  “headache”  “Migraine”  “musculoskeletal pain” “rheumatoid”  “osteoarthrit*”  “Arthritic pain” | “Incidence”  “Prevalence”  “Occurrence”  “burden”  “Epidemiolog*” “Screen*”  “Treat*”  “Management”  “Therap*”  “Aware*”  “Unaware*”  “Knowledge” | “Diagnos*”  “Undiagnos*” “Adheren*”  “Complian*” “nonadheren*”  “non-adheren*”  “Control*”  “uncontrol*”  “Untreat*”  “Algeria”  “United Arab Emirates”  “South Africa” | “Egypt”  “Saudi Arabia” “Middle East” “Africa”  “Malaysia” “Philippines” “Vietnam” “Thailand” “Mexico”  “Brazil” “Argentina”  “Latin America” |
| **Neuropathic pain** | | | |
| “neuropathic pain” “neuralgia” “neuropathy” “neuropath* pain” “neurogenic pain” “neuralgia”  “nerve pain”  “diabet* neuropath*” “nerve injury”  “peripheral neuropath*”  “spinal cord injury” “post operative pain” | “Incidence” “Prevalence” “Occurrence” “burden”  “Epidemiolog*” “Screen*”  “Treat*”  “Management”  “Therap*”  “Aware*”  “Unaware*” “Knowledge” | “Diagnos*” “Undiagnos*” “Adheren*”  “ Complian*” “nonadheren*”  “non-adheren*”  “Control*”  “uncontrol*” “Untreat*”  “Algeria”  “United Arab Emirates”  “South Africa” | “Egypt”  “Saudi Arabia” “Middle East” “Africa” “Malaysia” “Philippines” “Vietnam” “Thailand” “Mexico”  “Brazil” “Argentina”  “Latin America” |
